# Supplementary material for: Synthesis of functional xLayMn/KIT-6 and features in hot coal gas desulphurization
Source: Royal Society of Chemistry journal article supplement (doi:10.1039/c5cp02256h), 2015-01-01
Supplement: c5cp02256h1.pdf [file c5cp02256h1.pdf]

*Supporting information*

**Synthesis of Functional xLayMn/KIT-6 and Feature of Hot Coal Gas  
Desulphurization**

Hong Xia, Fengmei Zhang, Zhaofei Zhang and Bingsi Liu\*

*Department of Chemistry, Tianjin University, Tianjin 300072, P. R. China*

**MCM-41 was synthesized according to ref. 1**

**Table S1.** Specific surface area ( $S_{BET}$ ), total pore volume ( $V_t$ ), micropore volume ( $V_{mic}$ ), mesopore volume ( $V_{meso}$ ) and average pore size ( $D_a$ ) of MCM-41, fresh 3La97Mn/MCM-41 and pure 3La97Mn.

| Sample         | $V_t$ (mm <sup>3</sup> /g) | $V_{meso}$<br>(mm <sup>3</sup> /g) | $V_{mic}$<br>(mm <sup>3</sup> /g) | $D_a$<br>(nm) | $S_{BET}$<br>(m <sup>2</sup> /g) |
|----------------|----------------------------|------------------------------------|-----------------------------------|---------------|----------------------------------|
| MCM-41         | 759                        | 437                                | 322                               | 3.3           | 913                              |
| 3La97Mn/MCM-41 | 137                        | 71                                 | 66                                | 2.4           | 228                              |
| Pure 3La97Mn   | 63                         | 58.4                               | 4.6                               | 4.5           | 56                               |

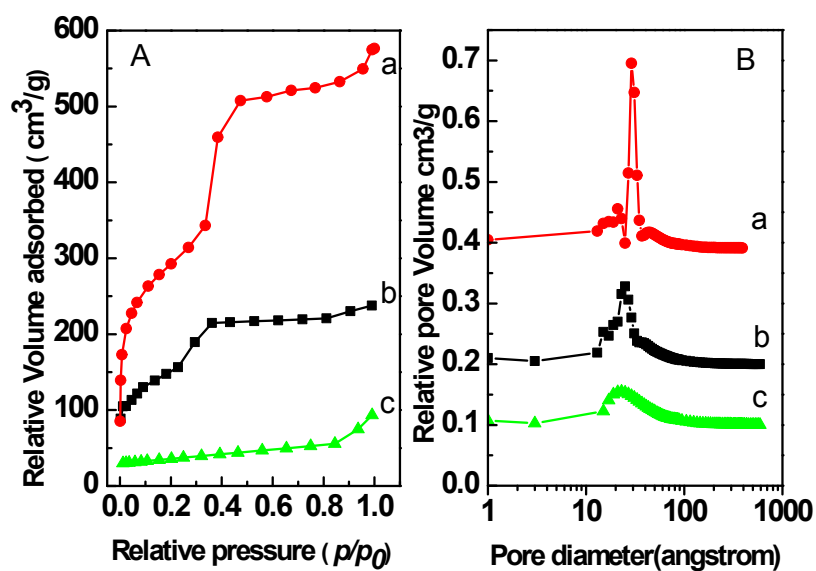

**Fig. S1** (A) N<sub>2</sub> adsorption isotherms and (B) pore diameter distributions of (a) MCM-41, (b) fresh 3La97Mn/MCM-41, (c) pure 3La97Mn.

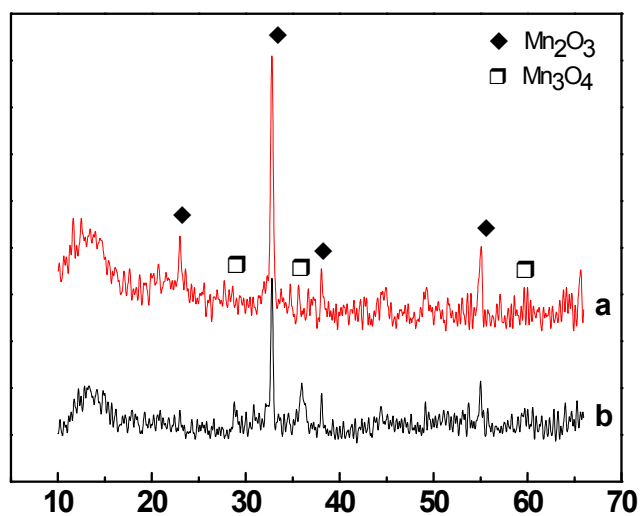

**Fig. S2** Wide angle XRD patterns of (a) fresh pure 3La97Mn, (d) fresh 3La97Mn /MCM-41.

## References

1. Cai, Q., Lin, W. Y., Xiao, F S, Pang, W. Q, Chen, X. H, Zou, B. S., The preparation of highly ordered MCM-41 with extremely low surfactant concentration, *Microporous Mesoporous Mater.*, 1999, **32**, 1-15.
